# Supplementary material
Source: PubMed Central journal article supplement (PMC6649247)
Supplement: ao8b02416_si_001.pdf [file ao8b02416_si_001.pdf]

## **Electronic supporting Information**

### **Methylene Blue loaded Upconverting Hydrogel Nanocomposite: Potential material for Near-Infrared Light-Triggered Photodynamic Therapy Application**

*Brahmaiah Meesaragandla<sup>ab</sup>, Debashrita Sarkar<sup>ab</sup> and Venkataramanan Mahalingam,<sup>\*ab</sup>*

*a Department of Chemical Sciences, Indian Institute of Science Education and Research (IISER) Kolkata, Mohanpur, West Bengal 741252, India.*

*b Center for Advanced Functional Materials (CAFAM), Indian Institute of Science Education and Research (IISER) Kolkata, Mohanpur, West Bengal 741252, India.*

Email address:

- Dr. Venkataramanan Mahalingam (corresponding author): [mvenkataramanan@yahoo.com](mailto:mvenkataramanan@yahoo.com)
- Brahmaiah Meesaragandla: [brahminrp@yahoo.com](mailto:brahminrp@yahoo.com)
- Debashrita Sarkar: [debashrita1chemistry@gmail.com](mailto:debashrita1chemistry@gmail.com)

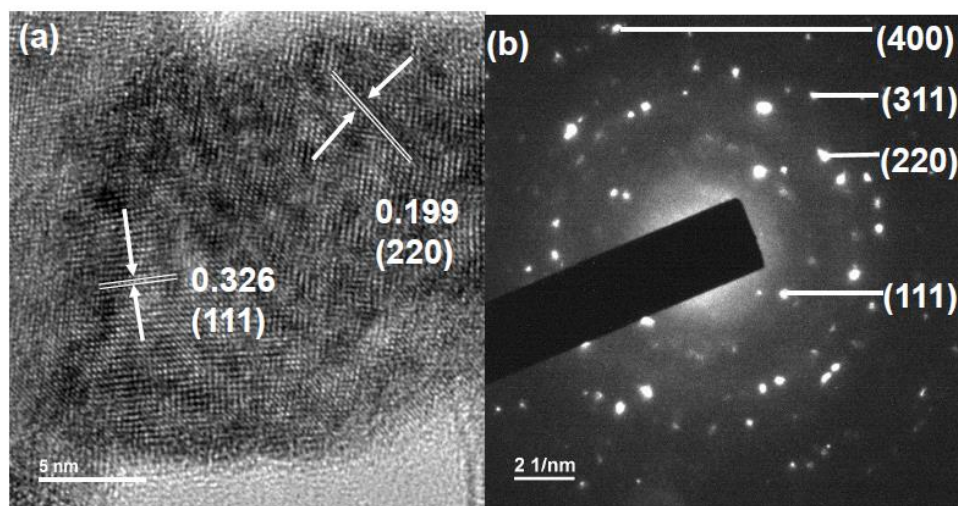

**Figure S1.** (a) HRTEM image of 10-UDA capped  $\text{Yb}^{3+}/\text{Er}^{3+}$ -doped  $\text{NaYF}_4$  NPs. (b) SAED pattern of 10-UDA capped  $\text{Yb}^{3+}/\text{Er}^{3+}$ -doped  $\text{NaYF}_4$  NPs.

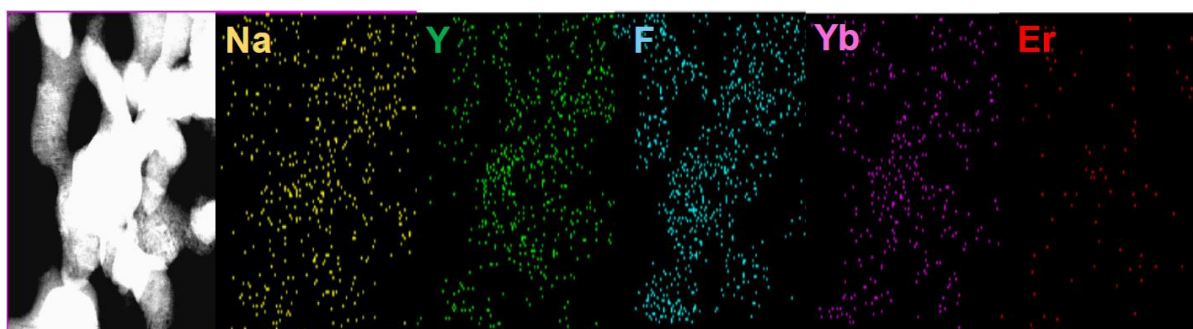

**Figure S2.** Elemental mapping of 10-UDA capped  $\text{Yb}^{3+}/\text{Er}^{3+}$ -doped  $\text{NaYF}_4$  NPs.

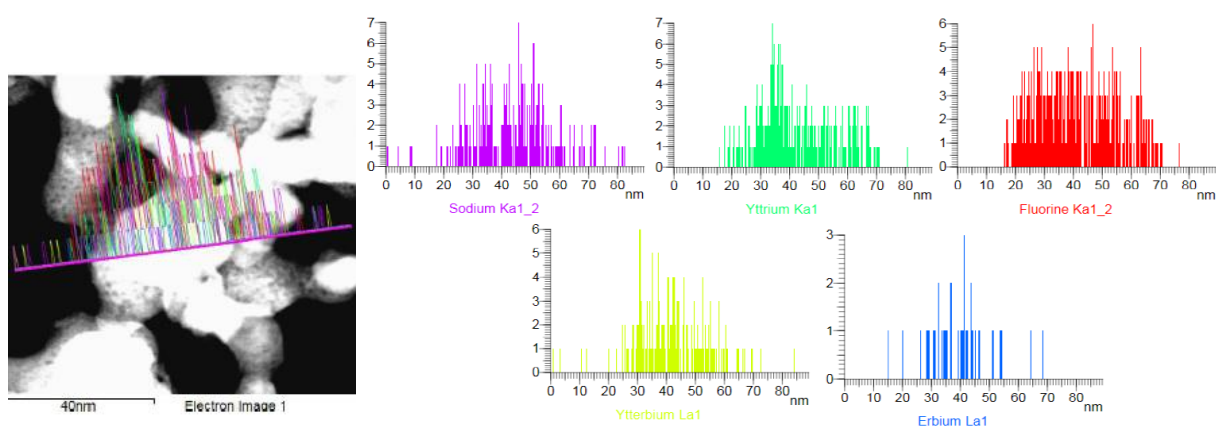

**Figure S3.** Line scanning of 10-UDA capped  $\text{Yb}^{3+}/\text{Er}^{3+}$ -doped  $\text{NaYF}_4$  NPs.

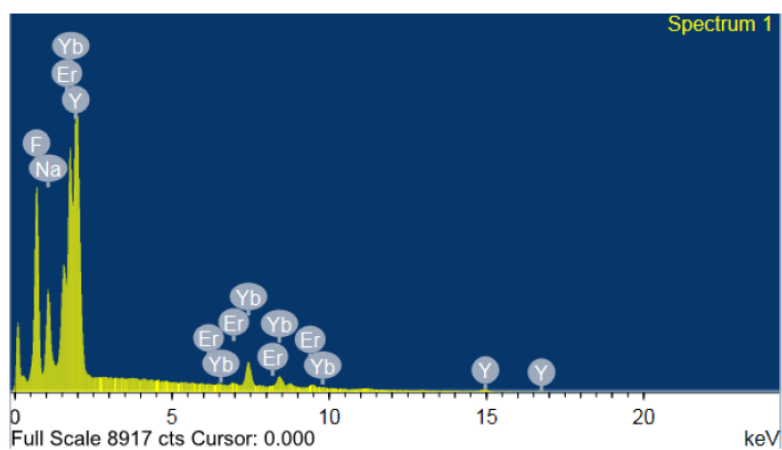

**Figure S4.** EDX Spectrum of 10-UDA capped  $\text{Yb}^{3+}/\text{Er}^{3+}$ -doped  $\text{NaYF}_4$  NPs.

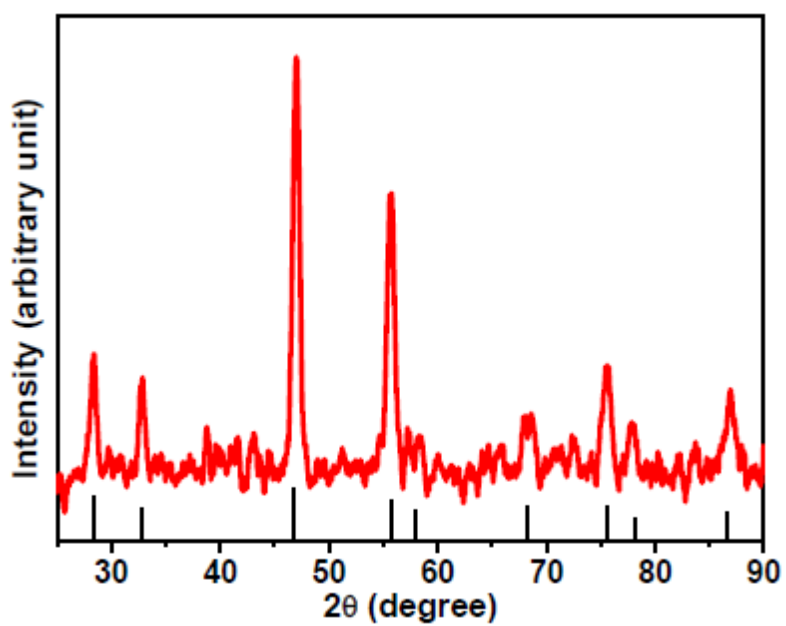

**Figure S5.** PXRD pattern of the nanocomposite gel (NIPAM-MBA@10-UDA- $\text{NaYF}_4:\text{Yb}^{3+}/\text{Er}^{3+}$ ).

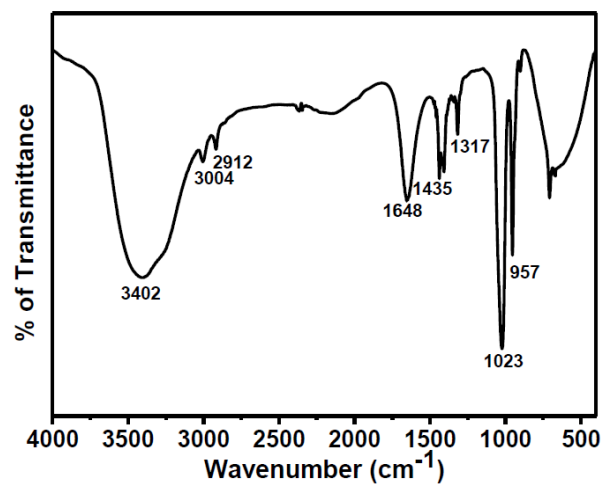

**Figure S6.** FTIR spectrum of the nanocomposite gel (NIPAM-MBA-@10-UDA-NaYF<sub>4</sub>:Yb<sup>3+</sup>/Er<sup>3+</sup>).

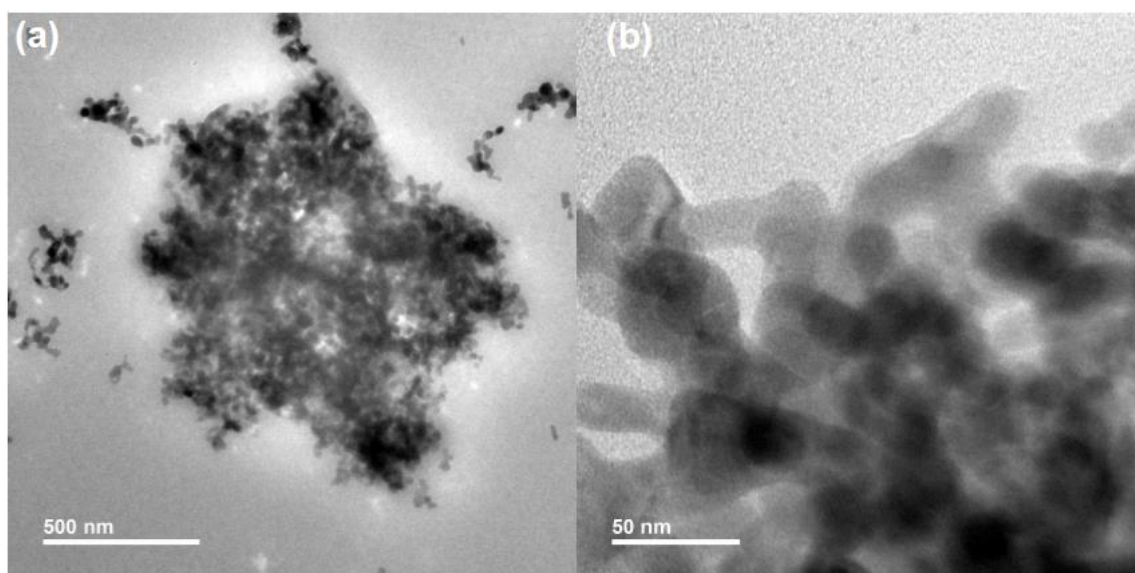

**Figure S7.** TEM images of NIPAM-MBA@10-UDA-NaYF<sub>4</sub>:Yb<sup>3+</sup>/Er<sup>3+</sup> hydrogel composite (a) low magnification and (b) high magnification.

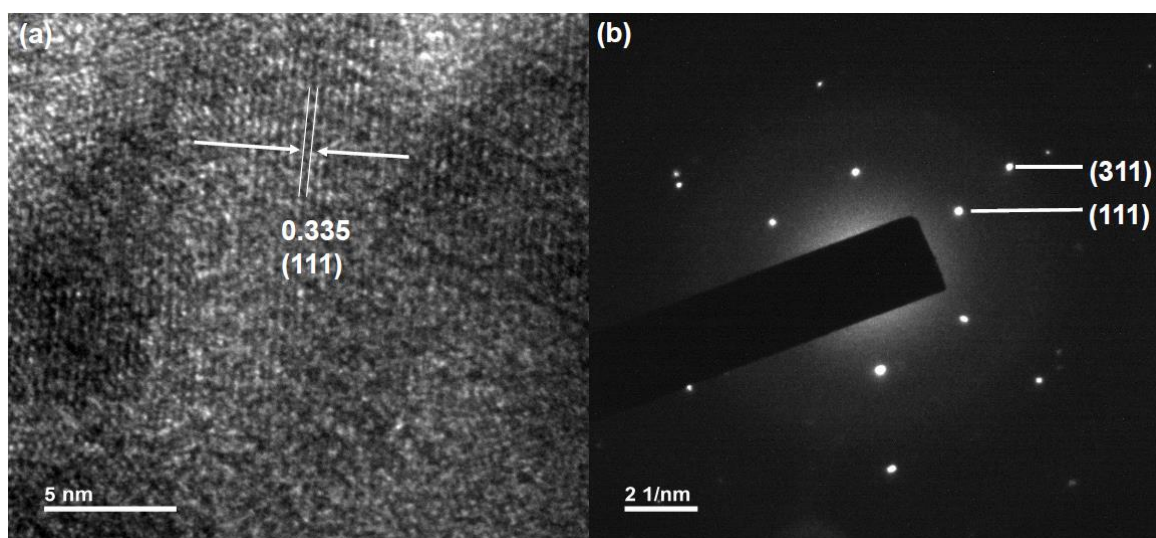

**Figure S8.** (a) HRTEM image of NIPAM-MBA@10-UDA-NaYF<sub>4</sub>:Yb<sup>3+</sup>/Er<sup>3+</sup> hydrogel composite (b) SAED pattern of NIPAM-MBA@10-UDA-NaYF<sub>4</sub>:Yb<sup>3+</sup>/Er<sup>3+</sup> hydrogel composite.

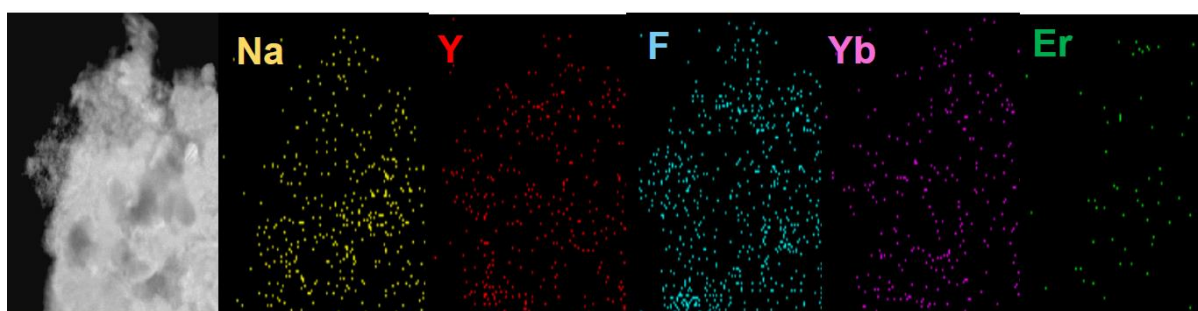

**Figure S9.** Elemental mapping of NIPAM-MBA@10-UDA-NaYF<sub>4</sub>:Yb<sup>3+</sup>/Er<sup>3+</sup> hydrogel composite.

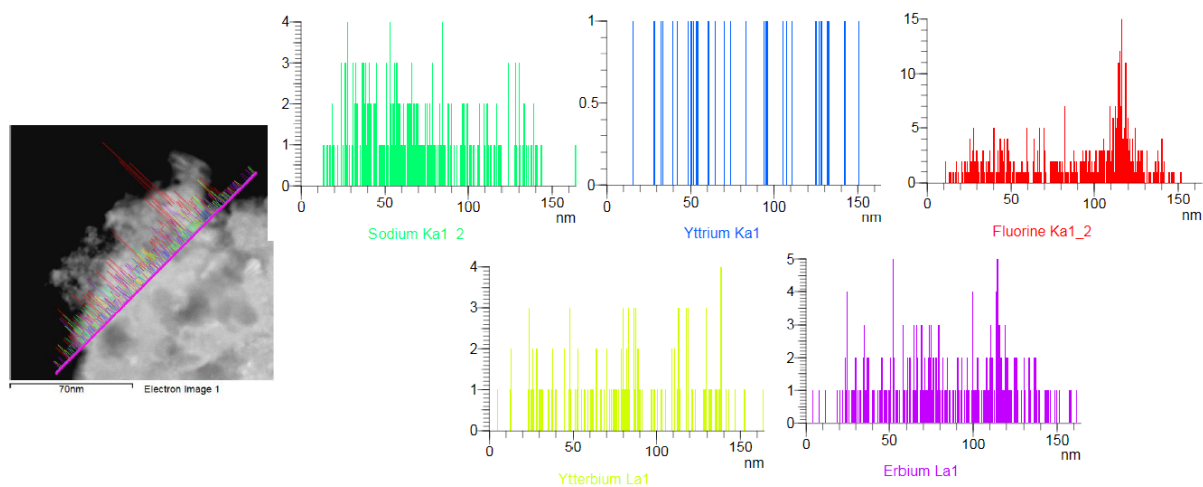

**Figure S10.** Line scanning of NIPAM-MBA@10-UDA-NaYF<sub>4</sub>:Yb<sup>3+</sup>/Er<sup>3+</sup> hydrogel composite.

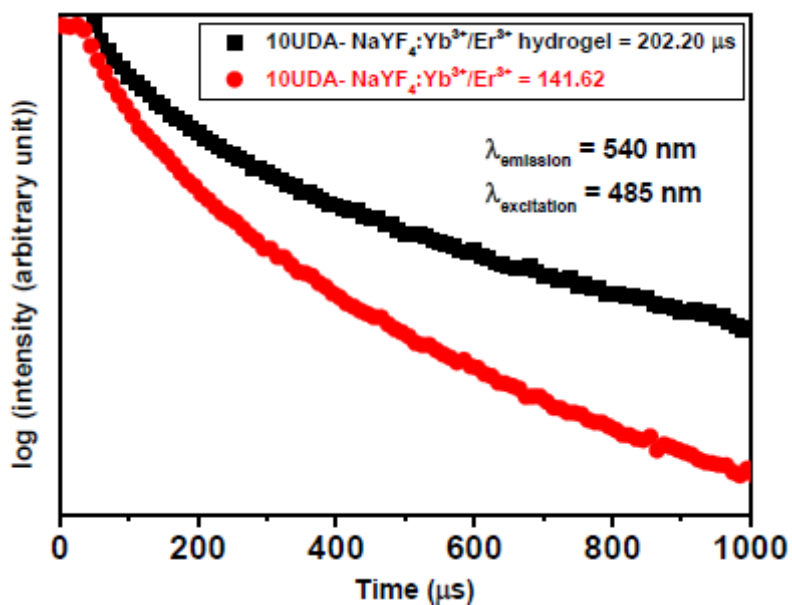

**Figure S11.** Lifetime decay curve of Er<sup>3+</sup>, <sup>4</sup>S<sub>3/2</sub> energy state obtained using direct excitation at 485 nm.

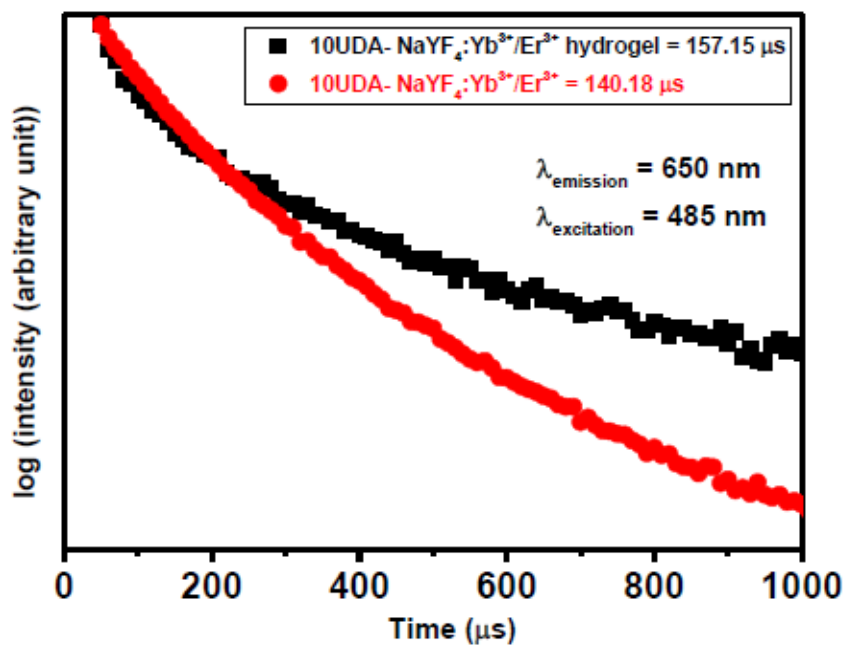

**Figure S12.** Lifetime decay curve of Er<sup>3+</sup>, <sup>4</sup>F<sub>9/2</sub> energy state obtained using direct excitation at 485 nm.

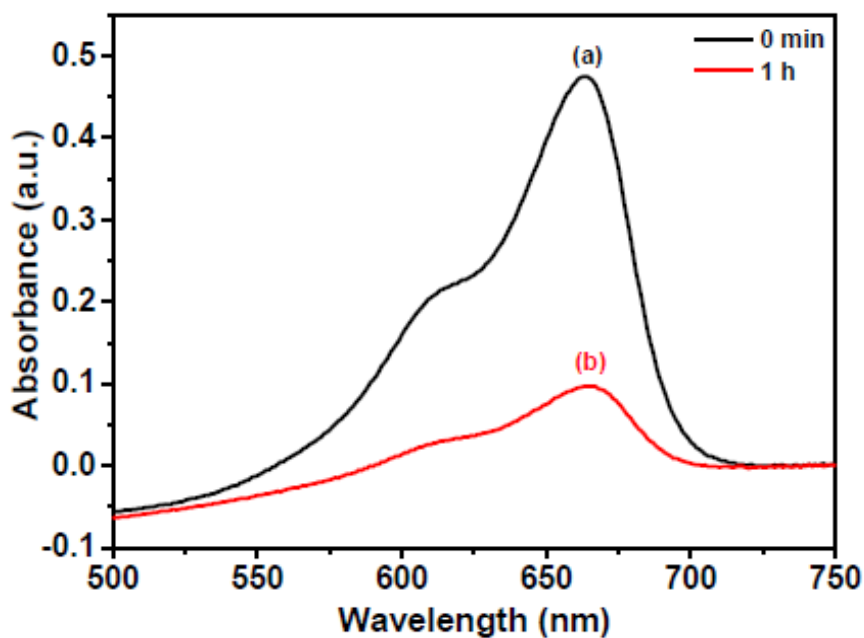

**Figure S13.** UV-Visible absorption spectra of MB loaded hydrogel composite supernatant (NIPAM-MBA@10-UDA-NaYF<sub>4</sub>:Yb<sup>3+</sup>/Er<sup>3+</sup>) measured at (a) 0 minute and (b) after 1 h.
